# Supplementary material
Source: PubMed Central journal article supplement (PMC3672900)
Supplement: mmc1.pdf [file mmc1.pdf]

**CROSS-SPECIES MECHANICAL FINGERPRINTING OF  
CARDIAC MYOSIN BINDING PROTEIN-C**

**Supporting Material**

Árpád Karsai<sup>1</sup>, Miklós S. Z. Kellermayer<sup>2,3</sup>, Samantha P. Harris<sup>1\*</sup>

<sup>1</sup>University of California - Davis, Davis, CA, USA,  
<sup>2</sup>MTA-SE Molecular Biophysics Research Group and <sup>3</sup>Department of Biophysics and Radiation  
Biology, Semmelweis University, Budapest, Hungary.

\*To Whom Correspondence Should be Addressed.

Department of Neurobiology, Physiology, and Behavior  
One Shields Avenue  
University of California-Davis  
Davis, CA 95616

## Supporting Material

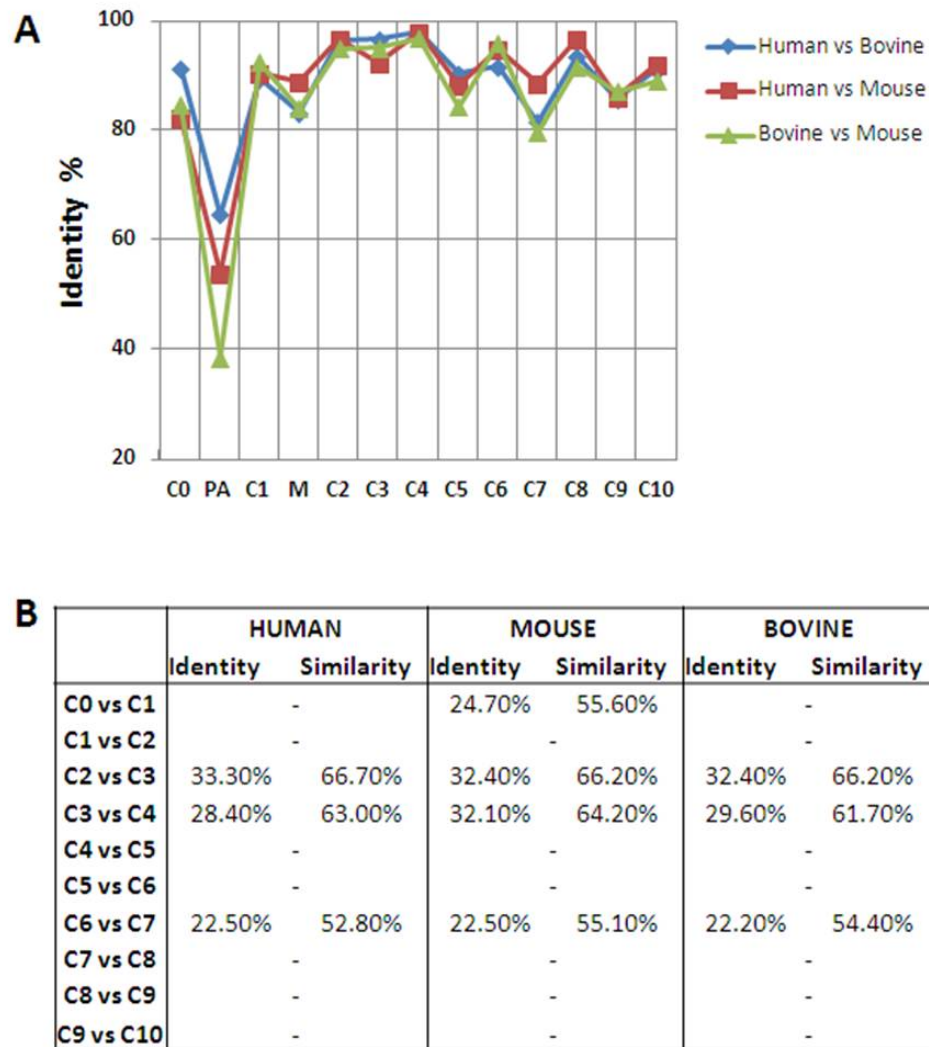

**Figure S1.** A) Sequence comparisons of human, bovine and mouse cMyBP-C by domain. Comparisons were performed using William Pearson's lalign software [1] with human (accession # NM\_000256.3), bovine (accession # NP\_001070004), and mouse (accession # AF097333) sequences. B) Table showing the percentage of identity and similarity among adjacent domains within human, bovine and mouse cMyBP-C sequences. Similarity was determined with the FASTA sequence comparison software of University of Virginia [2]. Dash indicates that there was no significant similarity between the domains.

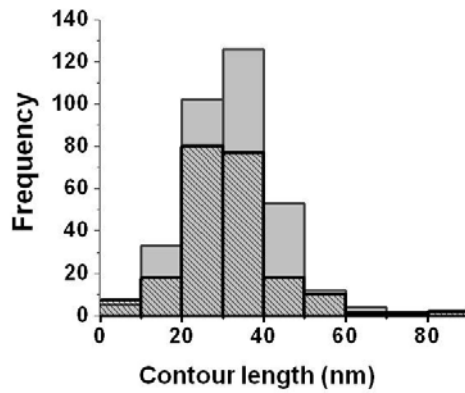

**Figure S2.** Histogram showing the contour length gain ( $\Delta L$ ) of the unfolded Ig/FNIII domains of human ( $32.3 \pm 11.8$  nm,  $n=340$ , gray) and bovine ( $31.7 \pm 11.3$  nm  $n=171$ , dark dashed) cMyBP-C.

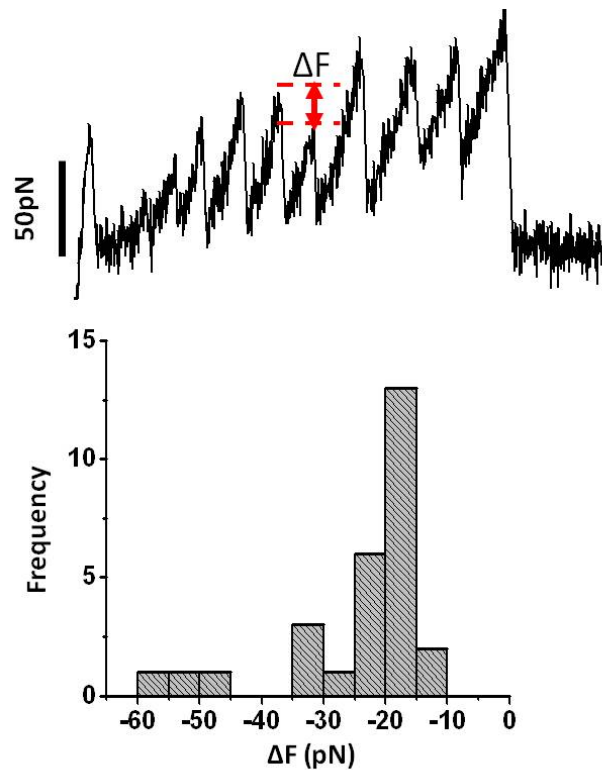

**Figure S3.** Histogram of the magnitude of all force drops of human cMyBP-C. The red arrow on the example force extension curve above the histogram indicates the magnitude of the force drop ( $\Delta F$ ).  $\Delta F$  was measured as the force difference (pN) between the two peaks.

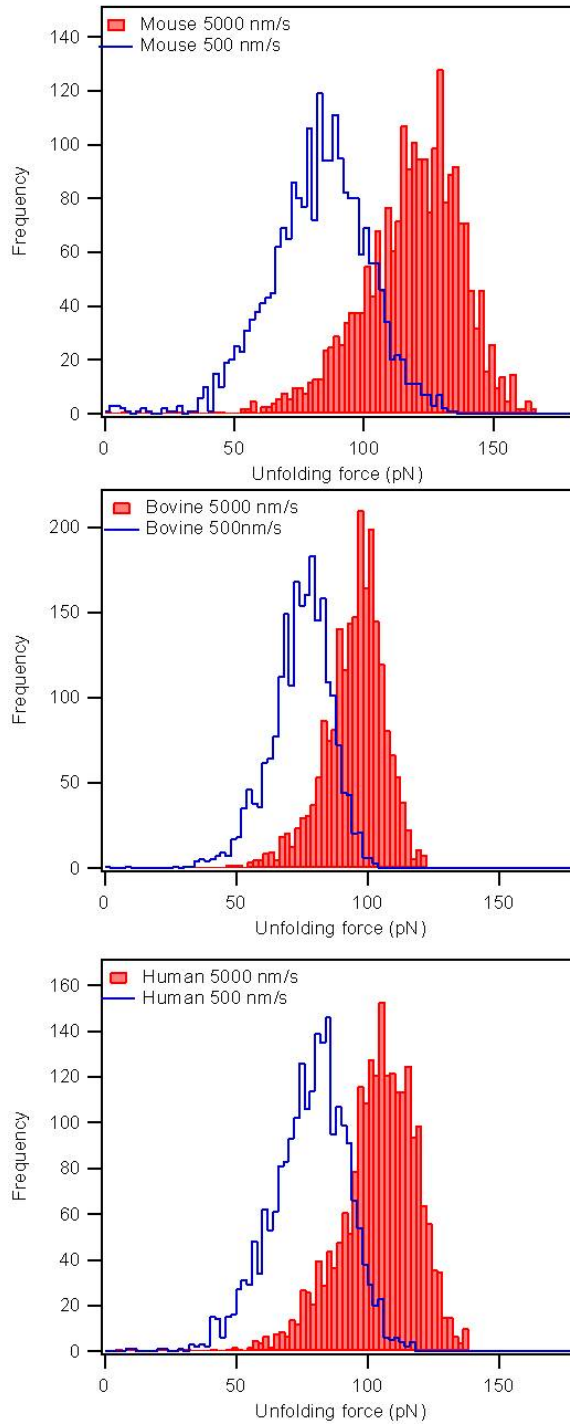

**Figure S4.** Histograms of simulated unfolding force values for bovine, human and mouse cMyBP-C obtained from Monte-Carlo simulations.

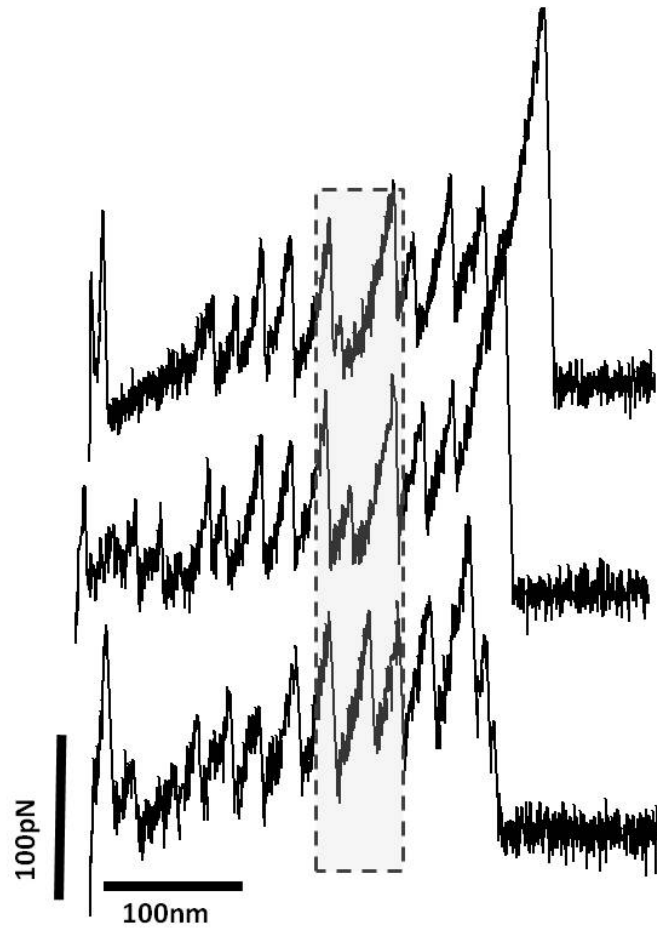

**Figure S5.** Force extension curves of human cMyBP-C with (top, middle) and without (bottom) force drops. The length gain before and after the force drops ( $\approx 60$  nm which is equal to the unfolded length of two domains) is indicated with a dashed box.

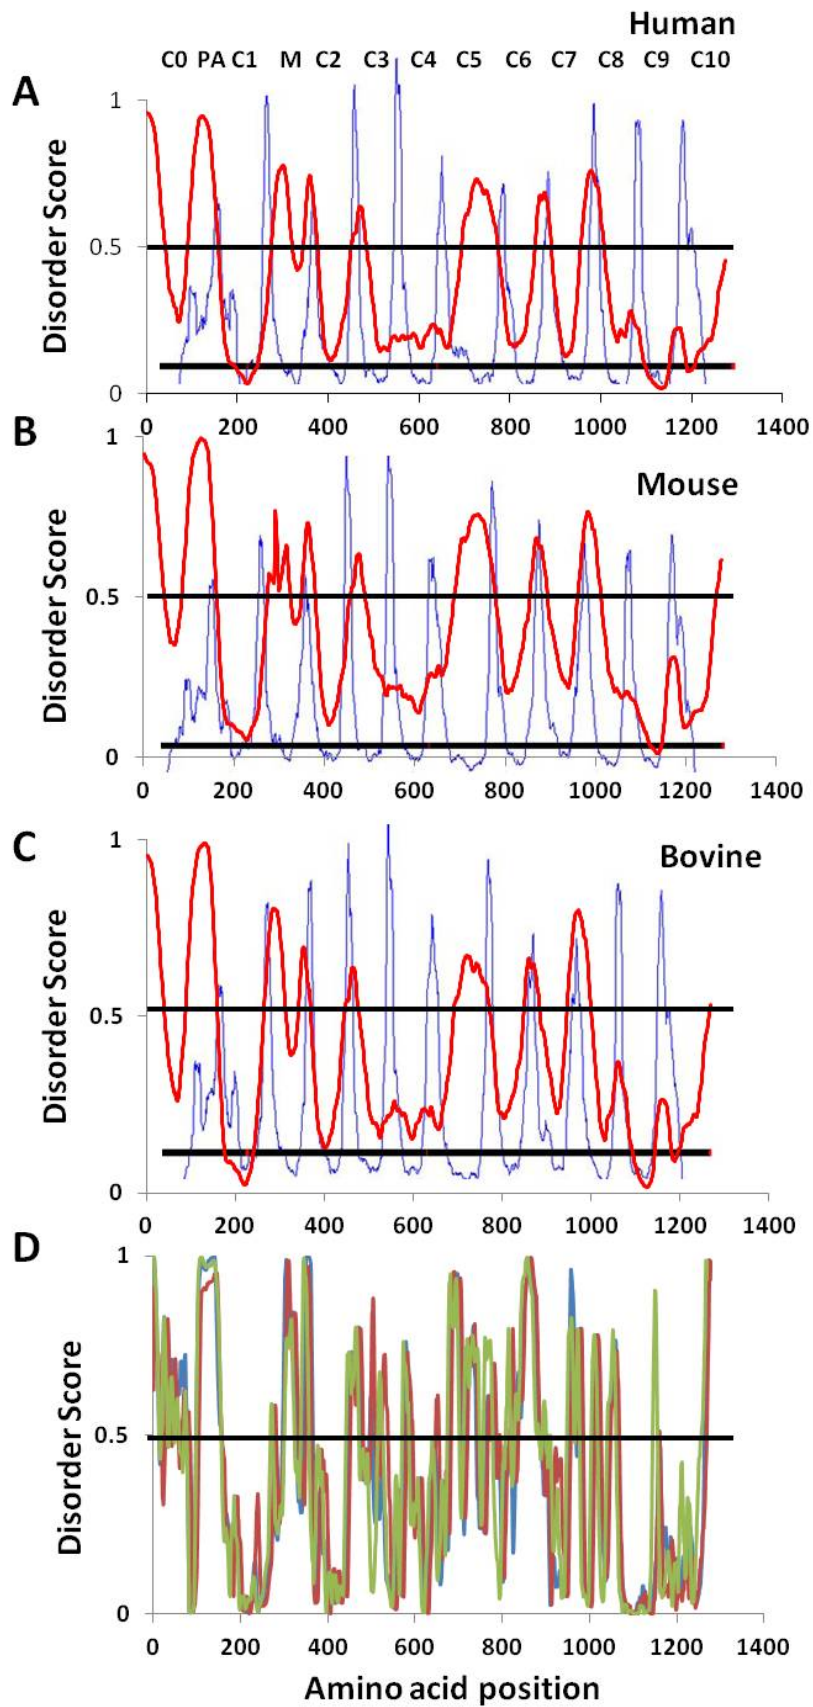

**Figure S6.** Computational predictions of intrinsically disordered segments (IDRs) within cMyBP-C. The VL3 PONDR algorithm [3] was used to predicted IDRs (red lines) for cMyBP-C from A) human, B) bovine and C) mouse.. A disorder score greater than 0.5 indicates increased propensity towards disorder. Blue peaks are the predicted domain boundaries obtained from DomPred [4]. D. Results of VLXT PONDR [5] predictions superimposed for each of the three cMyBP-C proteins showing that the P/A region, the M-domain and C2-C3 C6-C7 regions could contains IDRs as well as the CD loop within the C5 domain.

### References for Supporting Material

1. Huang, X., and W. Miller, *A time-efficient, linear-space local similarity algorithm*. Adv. Appl. Math. 1991 **12**: p. 337-357.
2. Pearson, W.R. and D.J. Lipman, *Improved tools for biological sequence comparison*. Proc Natl Acad Sci U S A, 1988. **85**(8): p. 2444-8.
3. Radivojac, P., et al., *Prediction of boundaries between intrinsically ordered and disordered protein regions*. Pac Symp Biocomput, 2003: p. 216-27.
4. Bryson, K., et al., *Protein structure prediction servers at University College London*. Nucleic Acids Res, 2005. **33**(Web Server issue): p. W36-8.
5. Romero, P., et al., *Sequence complexity of disordered protein*. Proteins, 2001. **42**(1): p. 38-48.
